# Supplementary material for: Behavioral and electrophysiological evidence for a neuroprotective role of aquaporin-4 in the 5xFAD transgenic mice model
Source: PubMed Central journal article supplement (PMC7218576; doi:10.1186/s40478-020-00936-3), 2020-05-12
Supplement: 40478_2020_936_MOESM12_ESM.pdf [file 40478_2020_936_MOESM12_ESM.pdf]

**Supplemental Table S1. Numbers of mice used in this study**

| Figures                                                      | WT        |     |      |      |      |      |      | AQP4 KO   |      | 5xFAD     |     |      |      |      |      |       |      |      | 5xFAD/AQP4 KO |     |       |      |      |      |      |      |       |   |   |
|--------------------------------------------------------------|-----------|-----|------|------|------|------|------|-----------|------|-----------|-----|------|------|------|------|-------|------|------|---------------|-----|-------|------|------|------|------|------|-------|---|---|
|                                                              | long term | 8 w | 16 w | 24 w | 32 w | 40 w | 48 w | long term | 48 w | long term | 8 w | 16 w | 20 w | 24 w | 32 w | 36 w  | 40 w | 45 w | long term     | 8 w | 16 w  | 20 w | 24 w | 32 w | 36 w | 40 w | 45 w  |   |   |
|                                                              | F         | M   | F    | M    | F    | M    | F    | F         | F    | F         | M   | F    | M    | F    | M    | F     | M    | F    | F             | M   | F     | M    | F    | M    | F    | M    | F     |   |   |
| Fig. 1                                                       |           |     |      |      |      |      |      | 11        |      | 11        |     |      |      |      |      |       |      |      | 11            |     |       |      |      |      |      |      |       |   |   |
| Fig. 2, Supplemental Fig. S2                                 |           |     |      |      |      |      | 1    |           | 1    |           |     | 5    |      |      |      |       | 6    |      |               |     | 5     |      |      |      |      |      | 10    |   |   |
| Fig. 3a, Fig. 4m-n, Fig. 5a-b, Fig. 6a, Supplemental Fig. S6 | 5         | 6   | 6    | 6    | 6    | 5    | 6    | 6         | 6    | 6         |     | 6    | 6    | 6    | 6    | 6(2)* | 6    | 6    |               | 6   | 6     | 6    | 6    | 6    | 6    | 6    | 6(1)* | 6 | 6 |
| Fig. 3b-e, Fig. 4a-j, Fig. 6b-g Supplemental Fig. S3, S5     |           |     |      |      |      |      | 1    |           |      |           |     |      |      |      |      |       | 3    |      |               |     |       |      |      |      |      |      | 3     |   |   |
| Fig. 4k-l                                                    |           |     |      |      |      |      |      |           |      |           |     |      |      |      |      |       |      | 3    |               |     |       |      |      |      |      |      |       | 3 |   |
| Fig. 5c-f                                                    |           |     |      |      |      |      |      |           |      |           |     |      |      | 9**  | 7**  |       |      |      |               |     |       |      |      | 9**  | 7    |      |       |   |   |
| Supplemental Fig. S1                                         | 16        |     |      |      |      |      |      | 20        |      | 20        |     |      |      |      |      |       |      |      |               |     | 20*** |      |      |      |      |      |       |   |   |
| Supplemental Fig. S4, S7                                     |           |     |      |      |      |      |      |           |      |           |     |      | 2    |      |      | 2     |      |      |               |     |       | 2    |      |      |      | 2    |       |   |   |

\*Numbers in parentheses are individuals added for measurement of soluble and insoluble A $\beta$ . \*\*A $\beta$ <sub>40</sub> were not measured for one individual due to a shortage of the sample. \*\*\*Eighteen mice were used for the measurement of body weight and grip strength at 38-42 weeks of age due to death of two individuals.

**Supplemental Table S2. Primers used for qPCR analysis**

| Genes        | Sequence                                                                                  |
|--------------|-------------------------------------------------------------------------------------------|
| Total AQP4   | 5'-AACCTCACCGCTGGCCATGGGCTCCTG-3'<br>5'-TACGGAAGACAATACCTCTCCCGAAGAGTC-3'                 |
| GAPDH        | 5'-ACTGGTGTCTTCACCACCATGGAGAAGGC-3'<br>5'-CATGAGGTCCACCACCCTGTTGCTGTAGC-3'                |
| GFAP         | 5'- CTCGGCACCCCTGAGGCAGAAGCTCCAAGATGAAAC-3'<br>5'- CTTAGACCGATAACCACTCCTCTGTCTCTTGCATG-3' |
| TREM2        | 5'- ACCTCTCCACCAGTTTCTCCTGCTGCTGATCACAG-3'<br>5'- AGTACTTTCTGCAGGACCTCAGCCTCTCGGCCTCG-3'  |
| CX3CR1       | 5'-CGTGAGACTGGGTGAGTGACTGGCACTTCCTGCAG-3'<br>5'- CAATGAAGAAGAAGGCAGTCGTGAGCTTGCACATG-3'   |
| IL1- $\beta$ | 5'-AGGCCTAATAGGCTCATCTGGGATCCTCTC-3'<br>5'- GTTCATCTCGGAGCCTGTAGTGCAGTTGTC-3'             |
| IL6          | 5'- TTCTTGGGACTGATGCTGGTGACAACCACG-3'<br>5'- AGGTAGCTATGGTACTCCAGAAGACCAGAG-3'            |
| ADAM10       | 5'- AGCATGCTGCTAGTAGTGGTCCTGAGCTCCTGAG-3'<br>5'- GATGCCTGTGTTCAATGACTTCTTCTTGCCATCTG-3'   |
| BACE1        | 5'- AGAGGCAGCTTTGTGGAGATGGTGGACAACCTGAG-3'<br>5'- ATGTTGGGAATGTGGGTCTGCTTCACCAGGGAGTC-3'  |
| NEP          | 5'- CAGCCCCATTCTTCAGTGCTCAGCAATCCAATC-3'<br>5'- ATGTTCAGTATCTTGTGAAGATCACCAAACCCGAC-3'    |
| IDE          | 5'- CACCCCACTACCTGGAGAGCAGAGTAGAAGCCTTC-3'<br>5'- CAGTCATGTTGTGAATCACTTCAGGTTGTGGCAAG-3'  |
